# Supplementary material for: Enhancing the dissolution and bacteriostatic activity of trimethoprim through salt formation
Source: Royal Society of Chemistry journal article supplement (doi:10.1039/d3ce00128h), 2023-01-01
Supplement: d3ce00128h1.pdf [file d3ce00128h1.pdf]

### Supporting Information

Authors: XingchenHu<sup>1</sup>; YuntianXiao<sup>1</sup>; LuguangQi<sup>1</sup>; YunheBai<sup>1</sup>; YingSun<sup>1</sup>; YangYe<sup>1</sup>; Chuang Xie<sup>1,2,3</sup>

Affiliates:

1 School of Chemical Engineering and Technology, Tianjin University, Tianjin 300072, PR China

2 National Engineering Research Center of Industrial Crystallization Technology, Tianjin University, Tianjin 300072, P.R. China

3 State Key Laboratory of Chemical Engineering, Tianjin University, Tianjin 300072, China

#### Preparation of Multicomponent Crystal

**Preparation of TMP-SYA-0.16H:** 0.0002 mol of TMP and 0.0002 mol of SYA were added to the glass bottle, and then 2.0 mL of methanol and 0.5 mL of water were added to the glass bottle. Filter the suspension using a 0.45 $\mu$ m syringe filter into another clean glass vial. The single crystal of TMP-SYA-0.16H can be obtained by placing the vial in a ventilated place at room temperature for 7-10 days.

**TMP-2,5HBA** and **TMP-2,6HBA** are prepared in a similar way to TMP-SYA-0.16H. The difference is that the solvent used by TMP-2,5HBA is 3mL methanol, and the solvent used by TMP-2,6HBA is 3mL acetonitrile.

**Preparation of TMP-OA:** Add 0.01molTMP and 0.01molOA into a 100mL glass bottle, and add 40mL methanol and 20mL water into the glass bottle. Heat the glass bottle in water at 70°C to dissolve the solid. Filter the solution into a clean glass bottle with a 0.45 $\mu$ m syringe filter, and cool down to 2°C at a cooling rate of 0.1°C/min. The single crystal of TMP-OA was obtained. **Preparation of TMP-GA-2M:** Add 0.009 mol TMP and 0.009 mol GA into a glass bottle, and then add 2.0 mL of methanol into the glass bottle. Heat the glass bottle in water at 60°C to dissolve the solid. Filter the solution into a clean glass bottle with a 0.45 $\mu$ m syringe filter, and cool down to 2°C at a cooling rate of 0.1°C/min. The single crystal of TMP-GA-2M was obtained.

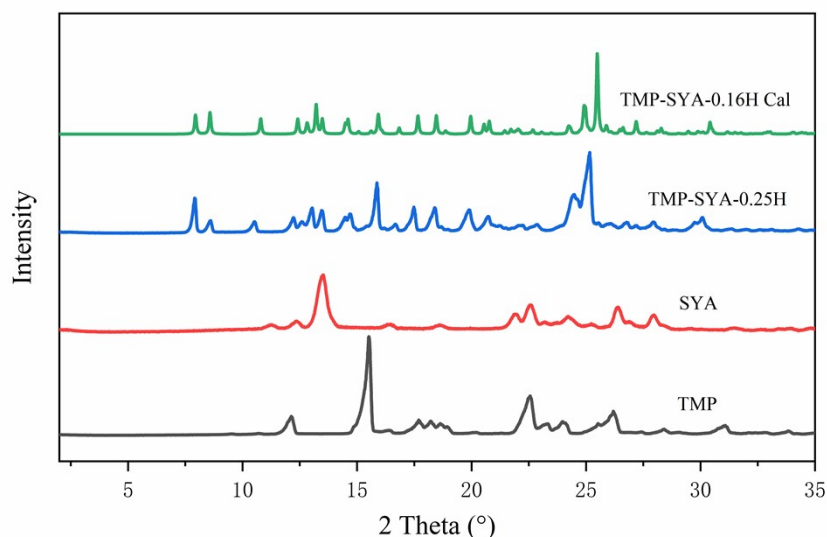

**Figure S1.** PXRD patterns of TMP, SYA, TMP-SYA-0.16H and calculated from the single crystal data: Cal.

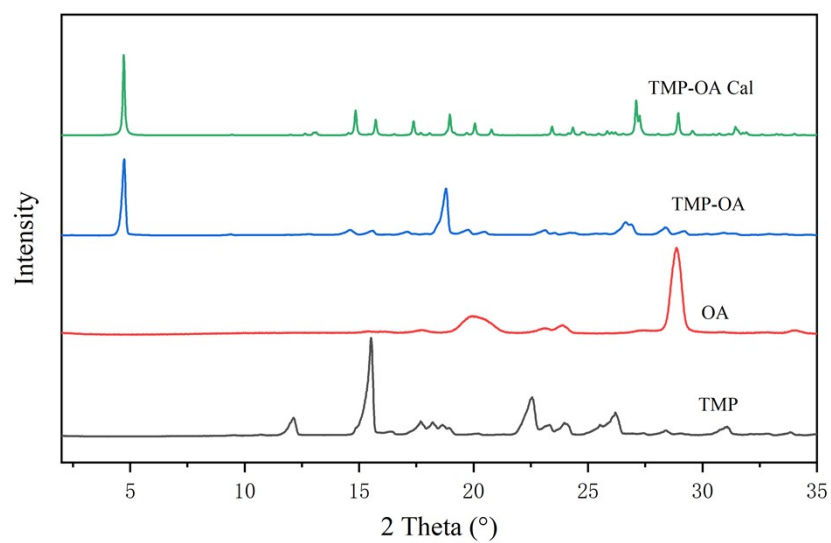

**Figure S2. PXRD patterns of TMP, OA, TMP-OA and calculated from the single crystal data: Cal.**

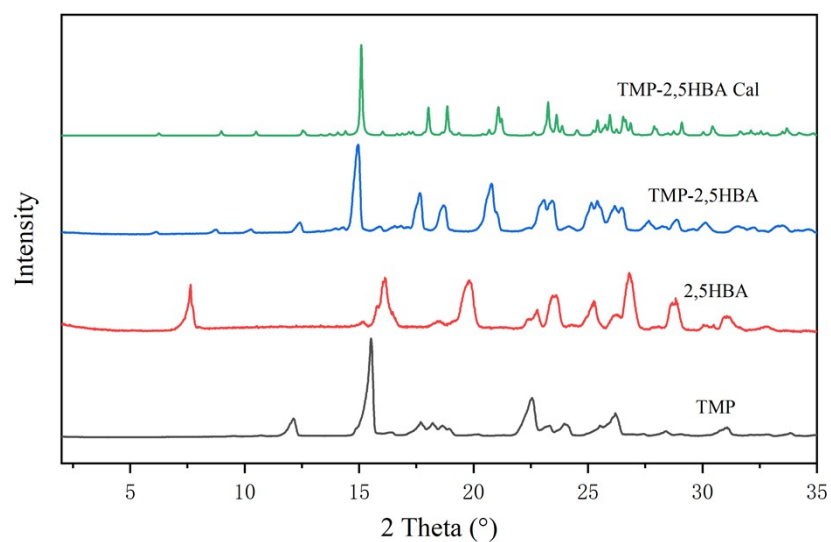

**Figure S3. PXRD patterns of TMP, 2,5HBA, TMP-2,5HBA and calculated from the single crystal data: Cal.**

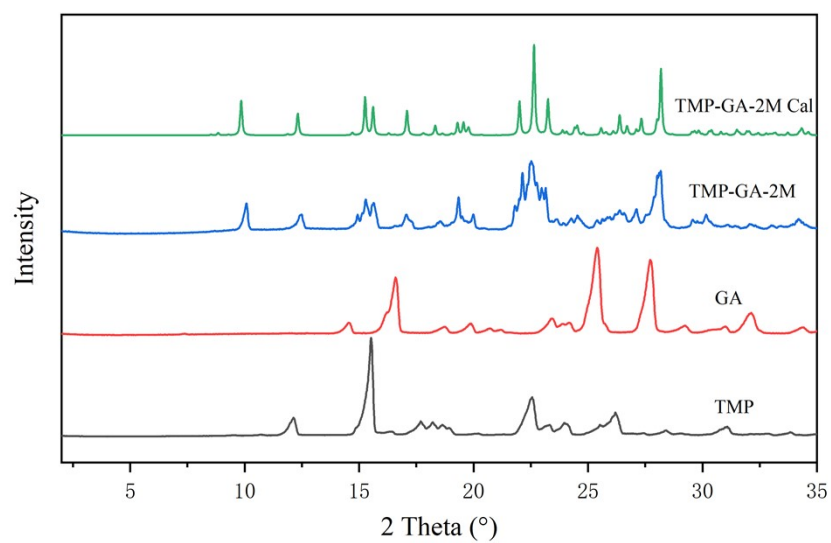

**Figure S4. PXRD patterns of TMP, GA, TMP-GA-2M and calculated from the single crystal data: Cal.**

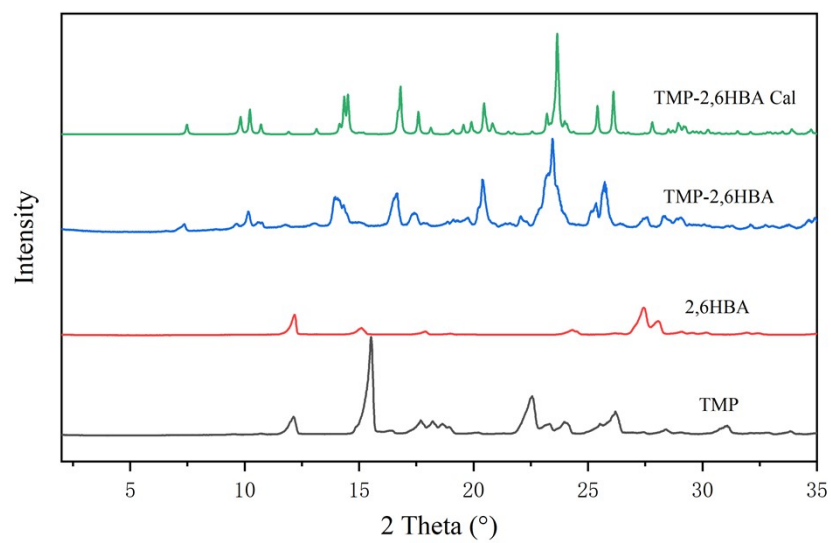

**Figure S5. PXRD patterns of TMP, 2,6HBA, TMP-2,6HBA and calculated from the single crystal data: Cal.**

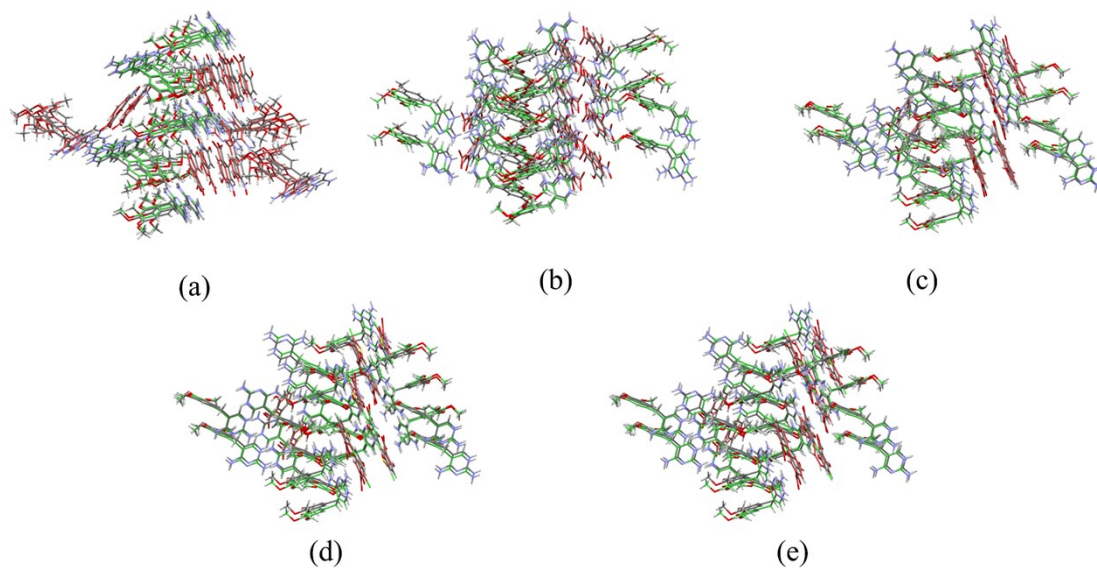

**Figure S6.** Analysis results of packing similarity of TMP-2,5HBA. The gray structure is TMP-2,5HBA, and the green structure is CSD Refcodes PARWOV (a), PARWUB (b), CESRUN (c), VADVOM (d) and HURMOW (e) respectively.

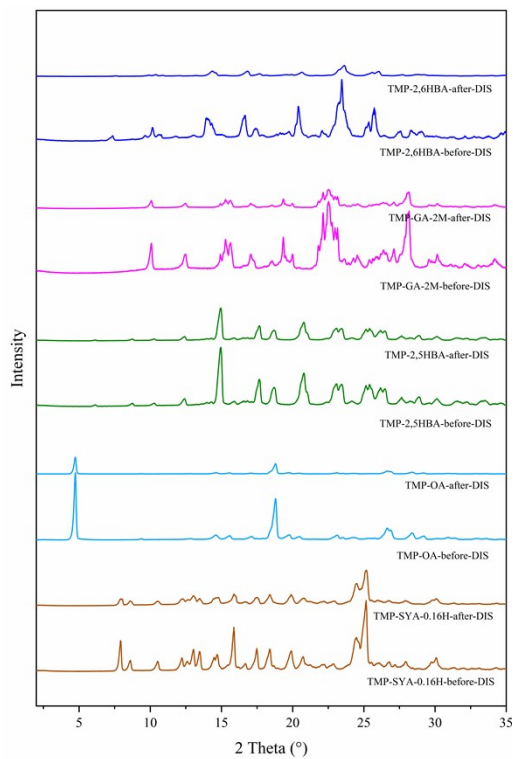

**Figure S7.** PXRD comparison of five salts before and after dissolution in buffer of pH=1.2.

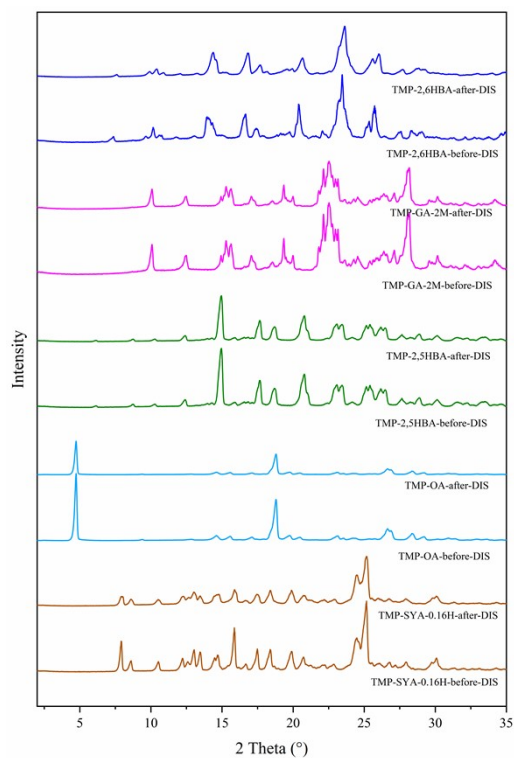

**Figure S8. PXRD comparison of five salts before and after dissolution in buffer of pH=6.8.**

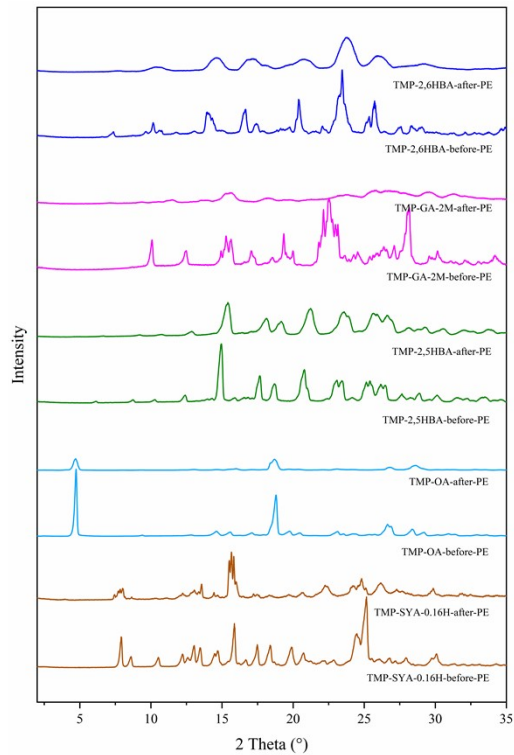

**Figure S9. PXRD comparison of five salts before and after 48 hours phase equilibration in buffer of pH=1.2.**

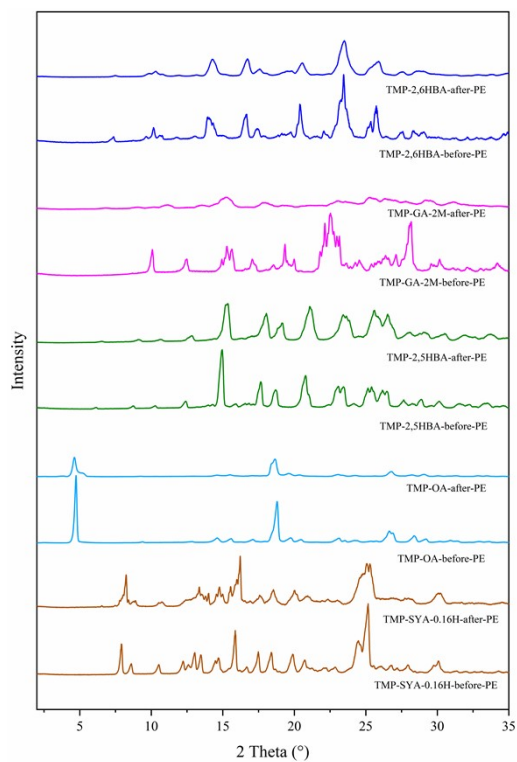

**Figure S10. PXRD comparison of five salts before and after 48 hours phase equilibration in buffer of pH=6.8.**

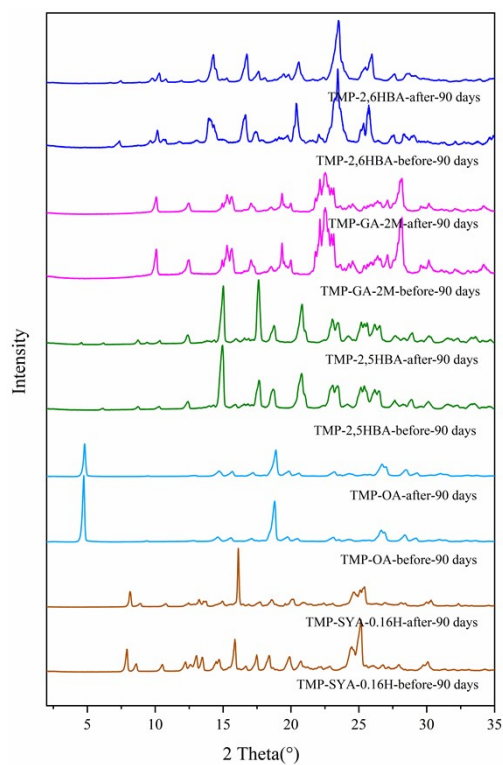

**Figure S11. XRD comparison of samples before and after storage (40°C, RH=75%) for 90 days.**

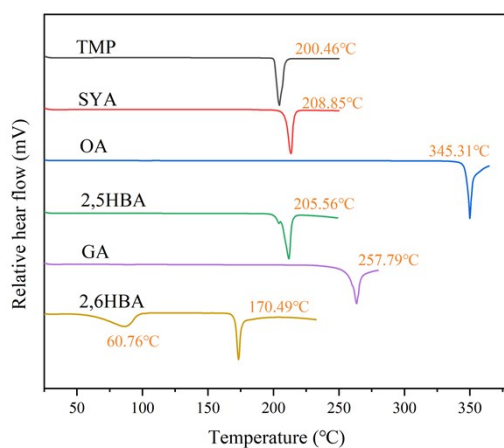

Figure S12. DSC thermograms of TMP and CCFs.

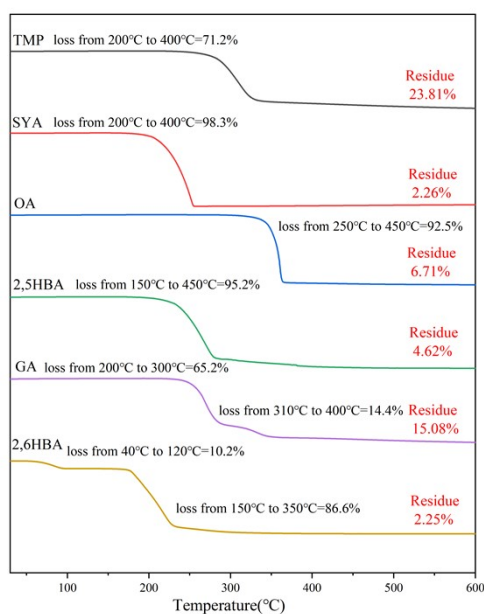

Figure S13. TGA profiles of TMP and CCFs.

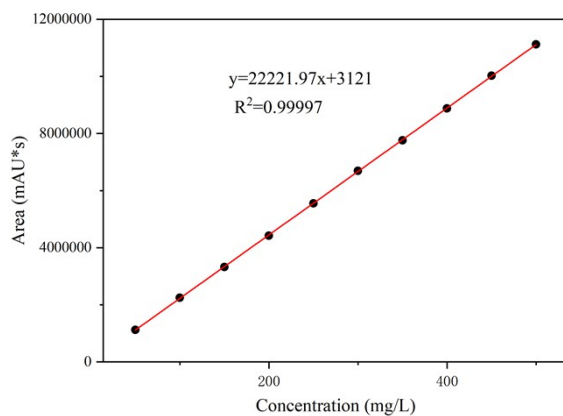

Figure S14. Standard curve of Trimethoprim content (concentration-peak area) determined by

## HPLC-UV.

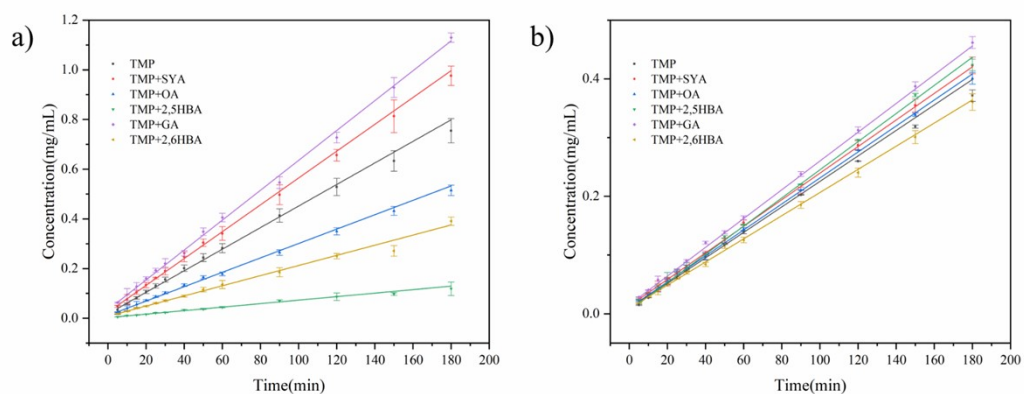

Figure S15. (a) IDR profiles of TMP and mixtures in pH 1.2 buffer at 37 °C; (b) IDR profiles of TMP and mixtures in pH 6.8 buffer at 37 °C.

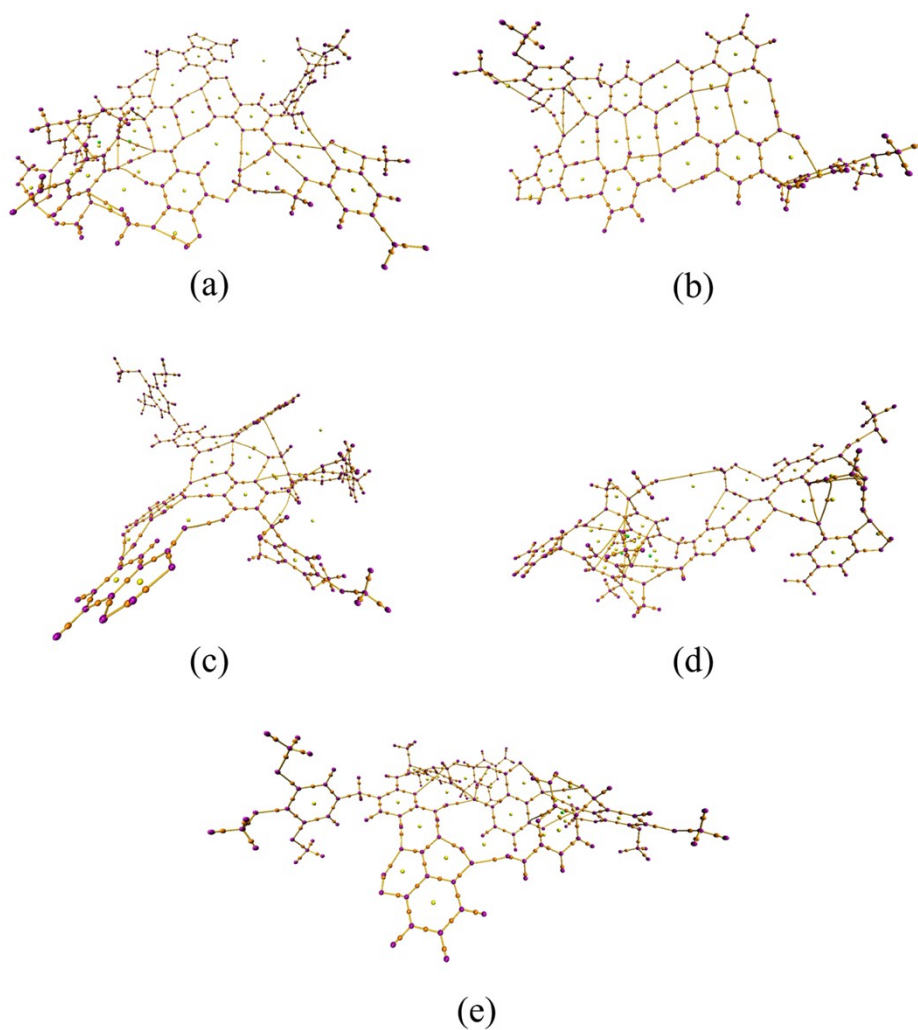

Figure S16. The topological geometrical structures of five salts, the purple, orange, yellow and



green spheres correspond to (3, -3), (3, -1), (3, +1) and (3, +3) critical points of electron density (nuclear critical point, bond critical point, ring critical point, cage critical point), respectively. The orange curve corresponds to the bond diameter. (a)TMP-SYA-0.16H, (b)TMP-OA, (c)TMP-2,5HBA, (d)TMP-GA-2M, (e)TMP-2,6HBA.

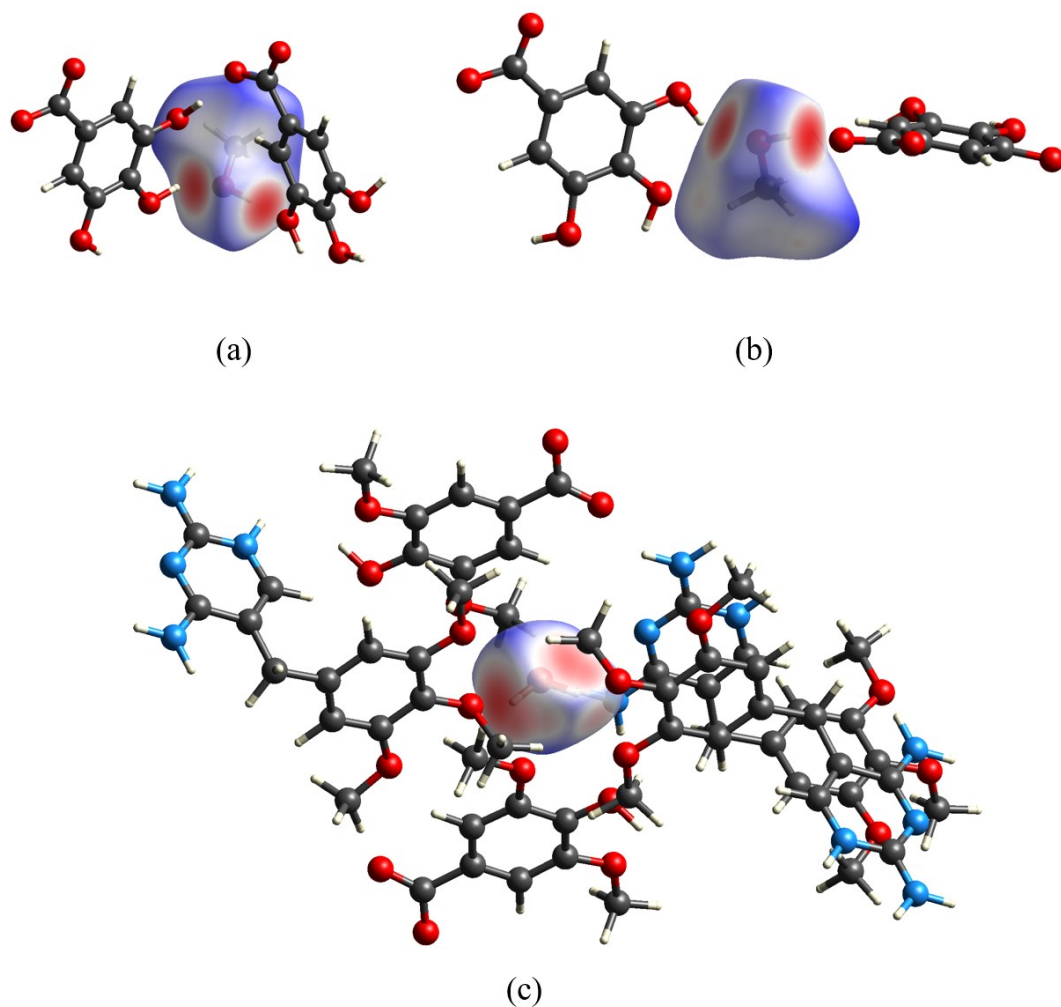

Figure S 17. (a)(b) The Hirshfeld Surface of two methanol molecules in TMP-GA-2M. (c) Hirshfeld Surface of water molecules in TMP-SYA-0.16 H.

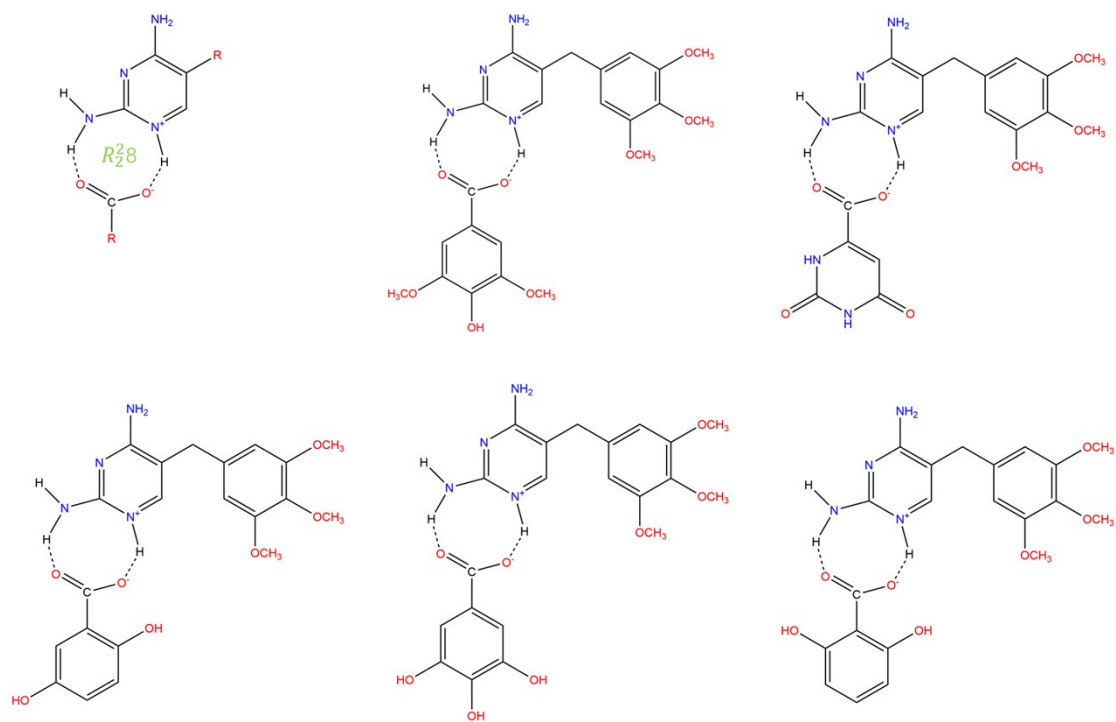

Figure S18.  $R_2^2(8)$  motif in five salts.

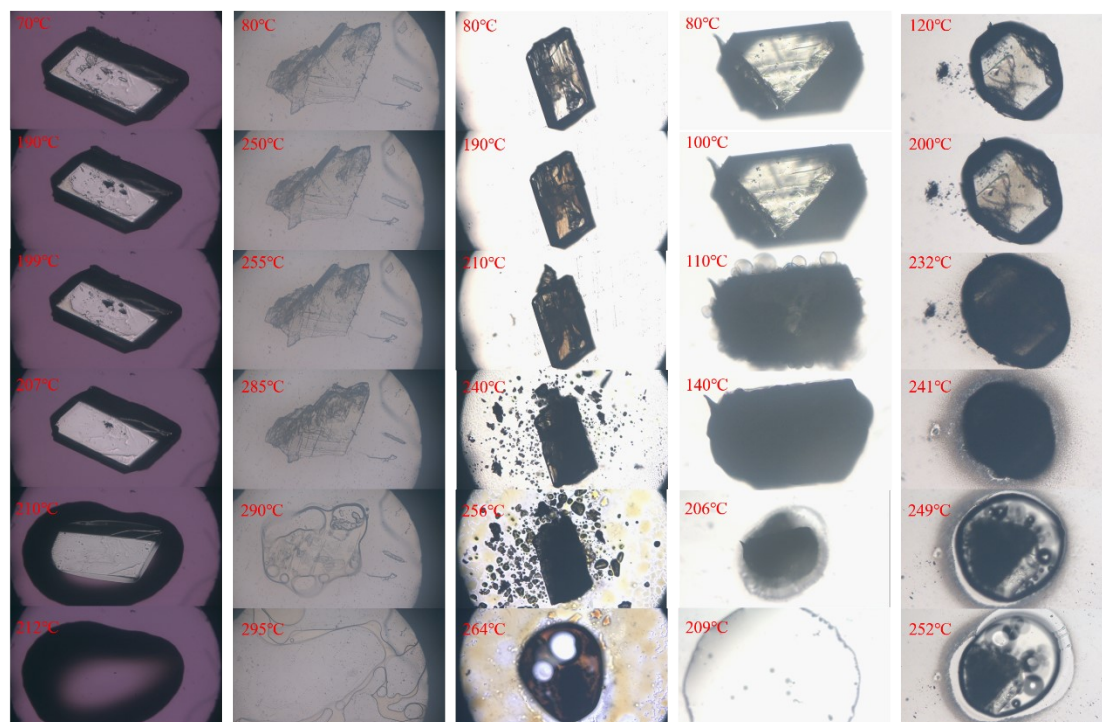

Figure S19. The pictures of hot stage microscope. (From left to right are TMP-SYA-0.16H; TMP-OA; TMP-2,5HBA; TMP-GA-2M; TMP-2,6HBA.)

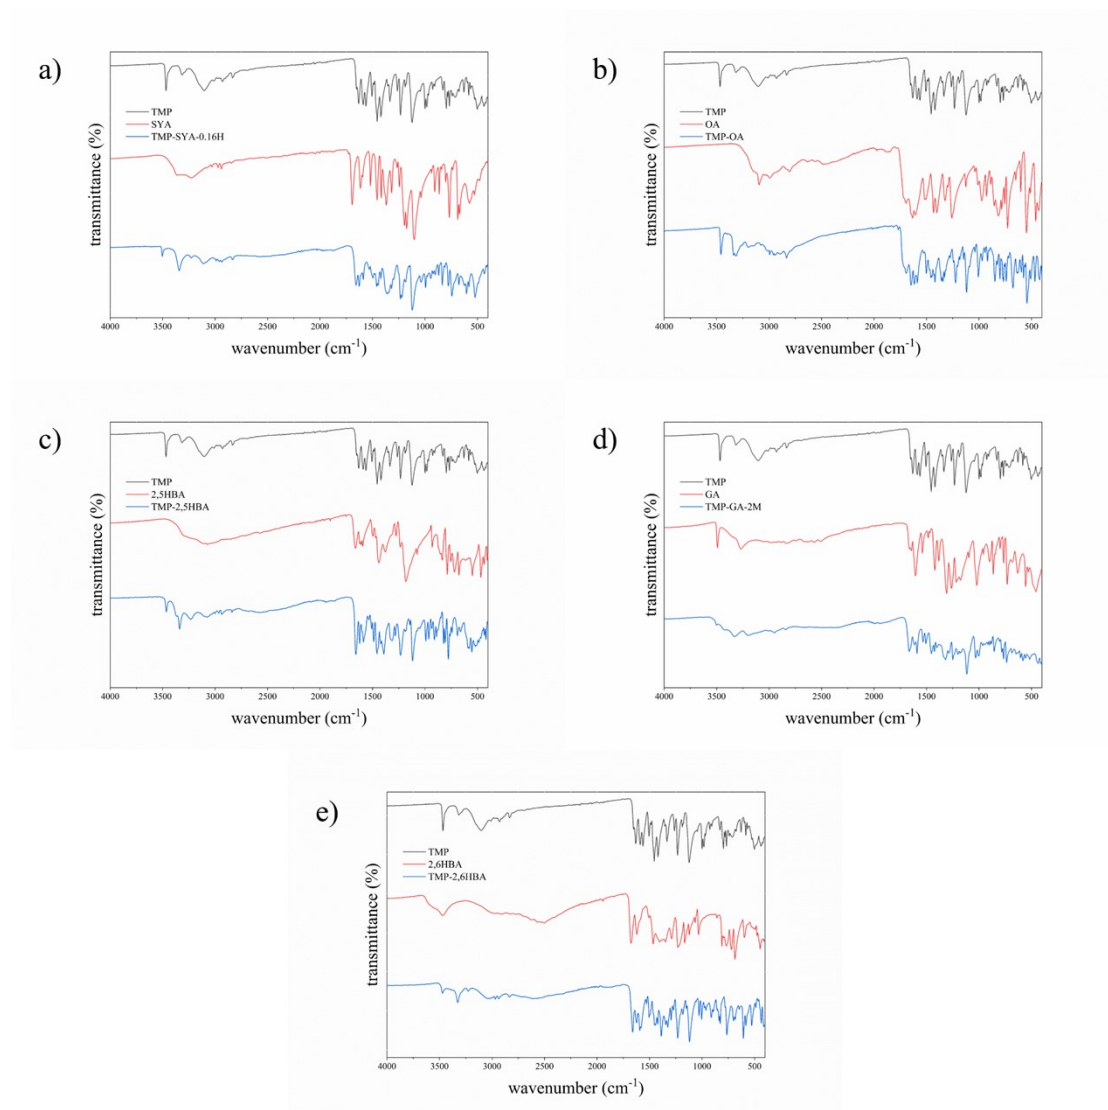

**Figure S20. FTIR spectrogram of TMP, CCFs and salts. (a)TMP-SYA-0.16H (b)TMP-OA (c)TMP-2,5HBA (d)TMP-GA-2M (e)TMP-2,6HBA.**

**Table S1. Screening Experiment Results Overview. (✗ Indicates that there is no new phase detected by PXRD; ✓ Indicates the presence of a new phase detected by PXRD; ✓✓ Indicates the presence of a new phase detected by PXRD and the crystal structure determined by SCXRD)**

| API          | CCF                        | Result |
|--------------|----------------------------|--------|
| Trimethoprim | L-glutamic acid            | ✓      |
| Trimethoprim | L-aspartic acid            | ✓      |
| Trimethoprim | L-glutamine                | ✓      |
| Trimethoprim | L-threonine                | ✗      |
| Trimethoprim | L-asparagine               | ✗      |
| Trimethoprim | DL-serine                  | ✓      |
| Trimethoprim | L-cysteine                 | ✗      |
| Trimethoprim | Syringic acid              | ✓✓     |
| Trimethoprim | Coumalic acid              | ✓      |
| Trimethoprim | DL-proline                 | ✗      |
| Trimethoprim | Orotic acid                | ✓✓     |
| Trimethoprim | Diflunisal                 | ✓      |
| Trimethoprim | 2,5-dihydroxybenzoic acid  | ✓✓     |
| Trimethoprim | 2,6-dihydroxybenzoic acid  | ✓✓     |
| Trimethoprim | 3,4- dihydroxybenzoic acid | ✗      |
| Trimethoprim | 3,5- dihydroxybenzoic acid | ✓      |
| Trimethoprim | Gallic acid                | ✓✓     |
| Trimethoprim | Ellagic acid               | ✓      |
| Trimethoprim | Caffeic acid               | ✗      |
| Trimethoprim | Cinnamic acid              | ✗      |
| Trimethoprim | DL-mandelic acid           | ✗      |
| Trimethoprim | Metformin hydrochloride    | ✗      |

**Table S2. Crystallographic Parameters of three unsolvated salts and two solvated salts.**

| Compound          | TMP-SYA-0.16H                                                       | TMP-OA                                                        | TMP-2,5HBA                                                    | TMP-GA-2M                                                      | TMP-2,6HBA                                                    |
|-------------------|---------------------------------------------------------------------|---------------------------------------------------------------|---------------------------------------------------------------|----------------------------------------------------------------|---------------------------------------------------------------|
| Empirical formula | C <sub>23</sub> H <sub>28.33</sub> N <sub>4</sub> O <sub>8.16</sub> | C <sub>19</sub> H <sub>22</sub> N <sub>6</sub> O <sub>7</sub> | C <sub>21</sub> H <sub>24</sub> N <sub>4</sub> O <sub>7</sub> | C <sub>23</sub> H <sub>32</sub> N <sub>4</sub> O <sub>10</sub> | C <sub>21</sub> H <sub>24</sub> N <sub>4</sub> O <sub>7</sub> |
| Formula weight    | 491.42                                                              | 446.42                                                        | 444.44                                                        | 524.52                                                         | 444.44                                                        |
| Temperature (K)   | 113.15                                                              | 113.15                                                        | 113.15                                                        | 113.15                                                         | 113.15                                                        |
| Crystal system    | monoclinic                                                          | triclinic                                                     | monoclinic                                                    | monoclinic                                                     | monoclinic                                                    |

| Space group                                          | P 2 <sub>1</sub> /n | P-1         | P 2 <sub>1</sub> /n | P 2 <sub>1</sub> /c | C 2/c       |
|------------------------------------------------------|---------------------|-------------|---------------------|---------------------|-------------|
| a (Å)                                                | 12.1553(5)          | 7.0878(6)   | 7.0172(3)           | 11.2636(10)         | 25.4626(13) |
| b (Å)                                                | 8.8076(3)           | 7.5969(7)   | 28.2186(13)         | 20.7045(13)         | 9.2831(4)   |
| c (Å)                                                | 22.3040(7)          | 18.9464(14) | 10.7877(5)          | 12.0759(11)         | 19.5540(11) |
| α (°)                                                | 90                  | 91.152(7)   | 90                  | 90                  | 90          |
| β (°)                                                | 94.608(3)           | 98.566(7)   | 103.469(5)          | 117.535(11)         | 111.922(6)  |
| γ (°)                                                | 90                  | 103.763(8)  | 90                  | 90                  | 90          |
| Volume (Å <sup>3</sup> )                             | 2380.13(15)         | 978.19(15)  | 2077.38(17)         | 2497.2(4)           | 4287.8(4)   |
| Z                                                    | 4                   | 2           | 4                   | 4                   | 8           |
| <i>P</i> <sub>calc</sub> (g/cm <sup>3</sup> )        | 1.376               | 1.516       | 1.421               | 1.395               | 1.377       |
| <i>F</i> (000)                                       | 1038                | 468         | 936                 | 1112                | 1873        |
| Reflections collected                                | 18662               | 14852       | 26572               | 19767               | 23814       |
| Goodness-of-fit on F <sup>2</sup>                    | 1.023               | 1.0461      | 1.0391              | 1.054               | 1.0264      |
| R <sub>int</sub>                                     | 0.0412              | 0.0606      | 0.0853              | 0.0944              | 0.0573      |
| R <sub>1</sub> indexes [ <i>I</i> > 2σ ( <i>I</i> )] | 0.0425              | 0.0757      | 0.0650              | 0.0551              | 0.0597      |
| wR <sub>2</sub> indexes [all data]                   | 0.1115              | 0.2203      | 0.1586              | 0.1415              | 0.1504      |
| CCDC                                                 | 2221414             | 2221420     | 2221421             | 2221425             | 2221430     |

**Table S3. Hydrogen bond geometrical parameters of salts**

| Compound      | D-H...A                                            | d(D-H)/Å | d(H-A)/Å  | d(D-A)/Å   | θ(D-H...A) <sup>o</sup> | Symmetry code         |
|---------------|----------------------------------------------------|----------|-----------|------------|-------------------------|-----------------------|
| TMP-SYA-0.16H | O <sub>5</sub> -H <sub>5</sub> ...O <sub>1</sub>   | 0.841(9) | 1.836(10) | 2.6799(14) | 171.5(19)               | -x+1/2, y+1/2, -z+1/2 |
|               | C <sub>9</sub> -H <sub>9A</sub> ...O <sub>6</sub>  | 0.98     | 2.42      | 2.773(8)   | 153                     | -x+1, -y+1, -z+1      |
|               | C <sub>9</sub> -H <sub>9A</sub> ...O <sub>9A</sub> | 0.98     | 2.14      | 2.789(8)   | 122                     | -x+1, -y+1, -z+1      |
|               | C <sub>9</sub> -H <sub>9C</sub> ...O <sub>6</sub>  | 0.98     | 1.91      | 2.773(8)   | 145                     |                       |
|               | O <sub>6</sub> -H <sub>6A</sub> ...O <sub>9</sub>  | 0.85     | 1.51      | 2.299(7)   | 153                     |                       |
|               | O <sub>6</sub> -H <sub>6A</sub> ...O <sub>7A</sub> | 0.85     | 2.62      | 3.152(10)  | 122                     |                       |
|               | O <sub>6</sub> -H <sub>6A</sub> ...O <sub>9A</sub> | 0.85     | 2.11      | 2.903(10)  | 156                     |                       |
|               | O <sub>6</sub> -H <sub>6B</sub> ...O <sub>7</sub>  | 0.85     | 2.42      | 3.130(8)   | 142                     | -x+1, -y, -z+1        |
|               | O <sub>6</sub> -H <sub>6B</sub> ...O <sub>7a</sub> | 0.85     | 2.48      | 3.206(10)  | 147                     | -x+1, -y, -z+1        |
|               | N <sub>1</sub> -H <sub>1A</sub> ...O <sub>6</sub>  | 0.870(9) | 2.427(14) | 3.145(7)   | 140.1(15)               | x+1/2, -y+1/2, z-1/2  |
|               | N <sub>1</sub> -H <sub>1B</sub> ...O <sub>5</sub>  | 0.877(9) | 2.091(10) | 2.9523(16) | 167.1(16)               | -x+3/2, y-1/2, -z+1/2 |
|               | N <sub>2</sub> -H <sub>2A</sub> ...O <sub>2</sub>  | 0.872(9) | 2.060(12) | 2.8550(16) | 151.0(14)               | x+1/2, -y+1/2, z-1/2  |
|               | N <sub>2</sub> -H <sub>2B</sub> ...O <sub>2</sub>  | 0.874(9) | 2.040(9)  | 2.9066(16) | 171.1(15)               | -x+1/2, y+1/2, -z+1/2 |
|               | N <sub>4</sub> -H <sub>4</sub> ...O <sub>1</sub>   | 0.881(9) | 1.789(10) | 2.6586(15) | 169.2(16)               | -x+1/2, y+1/2, -z+1/2 |
| TMP-OA        | N <sub>1</sub> -H <sub>1</sub> ...O <sub>2</sub>   | 0.88     | 1.90      | 2.775(2)   | 174                     | -x, -y-1, -z+1        |
|               | N <sub>3</sub> -H <sub>3</sub> ...O <sub>3</sub>   | 0.88     | 2.04      | 2.919(2)   | 174                     |                       |
|               | N <sub>5</sub> -H <sub>5A</sub> ...O <sub>4</sub>  | 0.88     | 1.81      | 2.680(3)   | 162                     | -x+1, -y+1, -z+1      |
|               | N <sub>5</sub> -H <sub>5B</sub> ...O <sub>4</sub>  | 0.88     | 1.94      | 2.797(3)   | 172                     |                       |
|               | N <sub>6</sub> -H <sub>6A</sub> ...O <sub>2</sub>  | 0.88     | 2.00      | 2.874(3)   | 174                     | -x+1, -y+1, -z+1      |

|            |                                                     |      |      |            |     |                       |
|------------|-----------------------------------------------------|------|------|------------|-----|-----------------------|
| TMP-2,5HBA | N <sub>1</sub> -H <sub>1B</sub> ···O <sub>1</sub>   | 0.88 | 2.27 | 3.006(2)   | 142 | -1/2+x, 3/2-y, 1/2+z  |
|            | N <sub>1</sub> -H <sub>1B</sub> ···O <sub>2</sub>   | 0.88 | 2.39 | 3.151(2)   | 145 | -1/2+x, 3/2-y, 1/2+z  |
|            | N <sub>3</sub> -H <sub>3</sub> ···O <sub>6</sub>    | 0.88 | 1.79 | 2.667(2)   | 170 | 1-x, 1-y, 1-z         |
|            | N <sub>4</sub> -H <sub>4A</sub> ···O <sub>7</sub>   | 0.88 | 2.16 | 2.921(2)   | 153 | -1+x, y, 1+z          |
|            | N <sub>4</sub> -H <sub>4B</sub> ···O <sub>7</sub>   | 0.88 | 2.06 | 2.900(2)   | 177 | 1-x, 1-y, 1-z         |
|            | O <sub>4</sub> -H <sub>4</sub> ···O <sub>5</sub>    | 0.84 | 1.86 | 2.696(2)   | 171 | 1+x, y, z             |
| TMP-GA-2M  | O <sub>5</sub> -H <sub>5A</sub> ···O <sub>6</sub>   | 0.84 | 1.74 | 2.493(2)   | 152 |                       |
|            | N <sub>1</sub> -H <sub>1</sub> ···O <sub>5</sub>    | 0.88 | 1.92 | 2.794(3)   | 177 |                       |
|            | N <sub>2</sub> -H <sub>2B</sub> ···O <sub>4</sub>   | 0.88 | 1.85 | 2.724(3)   | 177 |                       |
|            | N <sub>2</sub> -H <sub>2A</sub> ···O <sub>2</sub>   | 0.88 | 2.25 | 2.994(3)   | 140 | x+1, y, z+1           |
|            | N <sub>4</sub> -H <sub>4B</sub> ···N <sub>3</sub>   | 0.88 | 2.25 | 3.103(2)   | 163 | -x+1, -y+1, -z+2      |
|            | N <sub>4</sub> -H <sub>4A</sub> ···O <sub>1</sub>   | 0.88 | 2.23 | 3.030(3)   | 152 | -x, -y+1, -z+1        |
|            | O <sub>6</sub> -H <sub>6A</sub> ···O <sub>4</sub>   | 0.84 | 1.78 | 2.615(2)   | 170 | x, -y+1/2, z-1/2      |
|            | O <sub>7</sub> -H <sub>7</sub> ···O <sub>10</sub>   | 0.84 | 1.89 | 2.663(2)   | 152 |                       |
|            | O <sub>8</sub> -H <sub>8A</sub> ···O <sub>9</sub>   | 0.84 | 1.91 | 2.685(2)   | 152 |                       |
|            | O <sub>9</sub> -H <sub>9</sub> ···O <sub>5</sub>    | 0.84 | 1.87 | 2.689(2)   | 166 | x+1, -y+1/2, z+1/2    |
|            | C <sub>22</sub> -H <sub>22A</sub> ···O <sub>7</sub> | 0.98 | 2.56 | 3.193(3)   | 123 |                       |
| TMP-2,6HBA | O <sub>10</sub> -H <sub>10</sub> ···O <sub>8</sub>  | 0.84 | 1.97 | 2.784(2)   | 164 | x, -y+1/2, z-1/2      |
|            | N <sub>1</sub> -H <sub>1</sub> ···O <sub>7</sub>    | 0.88 | 1.84 | 2.7208(19) | 175 |                       |
|            | N <sub>2</sub> -H <sub>2B</sub> ···O <sub>6</sub>   | 0.88 | 1.93 | 2.778(2)   | 162 |                       |
|            | N <sub>2</sub> -H <sub>2A</sub> ···O <sub>4</sub>   | 0.88 | 2.08 | 2.8736(19) | 149 | -x+3/2, y+1/2, -z+1/2 |
|            | N <sub>4</sub> -H <sub>4A</sub> ···O <sub>1</sub>   | 0.88 | 2.20 | 3.0620(18) | 165 | x, -y+2, z-1/2        |
|            | N <sub>4</sub> -H <sub>4A</sub> ···O <sub>2</sub>   | 0.88 | 2.51 | 3.0825(18) | 123 | x, -y+2, z-1/2        |
|            | O <sub>4</sub> -H <sub>4</sub> ···O <sub>6</sub>    | 0.84 | 1.72 | 2.4793(19) | 149 |                       |
|            | O <sub>5</sub> -H <sub>5</sub> ···O <sub>7</sub>    | 0.84 | 1.82 | 2.5667(18) | 147 |                       |

**Table S4. HPLC-UV method parameters for TMP.**

| Parameter                                | Details                                       |
|------------------------------------------|-----------------------------------------------|
| Column                                   | Agilent Extend C18 column (5μm,4.6mm x 250mm) |
| Mobile phase                             | Acetic acid-methanol -water (3.75: 25: 71.25) |
| Flow rate                                | 1 mL/min                                      |
| Inject volume                            | 20μL                                          |
| Column temperature                       | 37°C                                          |
| Sample temperature                       | 37°C                                          |
| λ <sub>max</sub>                         | 275nm                                         |
| Retention time                           | 4.5min                                        |
| Equation                                 | y=22221.97x+3121                              |
| Regression coefficient (R <sup>2</sup> ) | 0.99997                                       |
| Calibration range                        | 50-500mg/L                                    |

**Table S5. Parameters of the Hydrogen Bonds for five salts in AIM Analysis.**

| Compound      | Bond Type                                         | $\rho$ (a.u.)        | $\nabla^2\rho$ (a.u.) | $G$ (a.u.)           | $V$ (a.u.)            | $H$ (a.u.)            | $E_H$ (kJ·mol <sup>-1</sup> ) |
|---------------|---------------------------------------------------|----------------------|-----------------------|----------------------|-----------------------|-----------------------|-------------------------------|
| TMP-SYA-0.16H | N <sub>4</sub> H <sub>4</sub> ···O <sub>1</sub>   | 6.07E <sup>-02</sup> | 1.47E <sup>-01</sup>  | 4.27E <sup>-02</sup> | -4.89E <sup>-02</sup> | -6.11E <sup>-03</sup> | -5.35E <sup>+01</sup>         |
|               | N <sub>2</sub> H <sub>2B</sub> ···O <sub>2</sub>  | 3.09E <sup>-02</sup> | 8.13E <sup>-02</sup>  | 2.13E <sup>-02</sup> | -2.24E <sup>-02</sup> | -1.02E <sup>-03</sup> | -2.57E <sup>+01</sup>         |
|               | N <sub>2</sub> H <sub>2A</sub> ···O <sub>2</sub>  | 2.58E <sup>-02</sup> | 8.14E <sup>-02</sup>  | 2.01E <sup>-02</sup> | -1.98E <sup>-02</sup> | 2.49E <sup>-04</sup>  | -2.10E <sup>+01</sup>         |
|               | C <sub>1</sub> O <sub>1</sub> ···O <sub>8</sub>   | 1.08E <sup>-02</sup> | 3.67E <sup>-02</sup>  | 8.87E <sup>-03</sup> | -8.56E <sup>-03</sup> | 3.08E <sup>-04</sup>  | -6.95E <sup>+00</sup>         |
|               | O <sub>3</sub> H <sub>3</sub> ···O <sub>1</sub>   | 3.60E <sup>-02</sup> | 1.18E <sup>-01</sup>  | 2.82E <sup>-02</sup> | -2.69E <sup>-02</sup> | 1.27E <sup>-03</sup>  | -3.05E <sup>+01</sup>         |
|               | O <sub>6</sub> H <sub>6A</sub> ···O <sub>9</sub>  | 4.85E <sup>-02</sup> | 2.00E <sup>-01</sup>  | 4.88E <sup>-02</sup> | -4.77E <sup>-02</sup> | 1.13E <sup>-03</sup>  | -4.22E <sup>+01</sup>         |
|               | N <sub>1</sub> H <sub>1B</sub> ···O <sub>5</sub>  | 2.54E <sup>-02</sup> | 7.22E <sup>-02</sup>  | 1.86E <sup>-02</sup> | -1.91E <sup>-02</sup> | -5.21E <sup>-04</sup> | -2.06E <sup>+01</sup>         |
| TMP-OA        | N <sub>1</sub> H <sub>1A</sub> ···O <sub>4</sub>  | 7.88E <sup>-03</sup> | 3.39E <sup>-02</sup>  | 7.05E <sup>-03</sup> | -5.62E <sup>-03</sup> | 1.43E <sup>-03</sup>  | -4.25E <sup>+00</sup>         |
|               | N <sub>3</sub> H <sub>3</sub> ···O <sub>3</sub>   | 3.17E <sup>-02</sup> | 7.60E <sup>-02</sup>  | 2.03E <sup>-02</sup> | -2.16E <sup>-02</sup> | 1.28E <sup>-03</sup>  | -2.64E <sup>+01</sup>         |
|               | N <sub>5</sub> H <sub>5B</sub> ···O <sub>4</sub>  | 5.33E <sup>-02</sup> | 1.51E <sup>-01</sup>  | 4.03E <sup>-02</sup> | -4.29E <sup>-02</sup> | -2.54E <sup>-03</sup> | -4.67E <sup>+01</sup>         |
|               | N <sub>5</sub> H <sub>5A</sub> ···O <sub>4</sub>  | 3.22E <sup>-02</sup> | 1.10E <sup>-01</sup>  | 2.64E <sup>-02</sup> | -2.52E <sup>-02</sup> | 1.14E <sup>-03</sup>  | -2.69E <sup>+01</sup>         |
|               | N <sub>6</sub> H <sub>6A</sub> ···O <sub>2</sub>  | 2.97E <sup>-02</sup> | 9.28E <sup>-02</sup>  | 2.27E <sup>-02</sup> | -2.23E <sup>-02</sup> | 4.64E <sup>-04</sup>  | -2.46E <sup>+01</sup>         |
| TMP-2,5HBA    | N <sub>1</sub> H <sub>1</sub> ···O <sub>2</sub>   | 3.94E <sup>-02</sup> | 1.21E <sup>-01</sup>  | 2.99E <sup>-02</sup> | -2.94E <sup>-02</sup> | 4.67E <sup>-04</sup>  | -3.37E <sup>+01</sup>         |
|               | N <sub>3</sub> H <sub>3</sub> ···O <sub>6</sub>   | 5.87E <sup>-02</sup> | 1.48E <sup>-01</sup>  | 4.19E <sup>-02</sup> | -4.69E <sup>-02</sup> | -4.93E <sup>-03</sup> | -5.17E <sup>+01</sup>         |
|               | N <sub>4</sub> H <sub>4B</sub> ···O <sub>7</sub>  | 3.16E <sup>-02</sup> | 8.10E <sup>-02</sup>  | 2.15E <sup>-02</sup> | -2.27E <sup>-02</sup> | -1.24E <sup>-03</sup> | -2.64E <sup>+01</sup>         |
|               | N <sub>4</sub> H <sub>4A</sub> ···O <sub>7</sub>  | 2.16E <sup>-02</sup> | 6.67E <sup>-02</sup>  | 1.67E <sup>-02</sup> | -1.68E <sup>-02</sup> | -6.24E <sup>-05</sup> | -1.71E <sup>+01</sup>         |
|               | O <sub>4</sub> H <sub>4</sub> ···O <sub>5</sub>   | 4.08E <sup>-02</sup> | 1.28E <sup>-01</sup>  | 3.16E <sup>-02</sup> | -3.12E <sup>-02</sup> | 3.47E <sup>-04</sup>  | -3.49E <sup>+01</sup>         |
| TMP-GA-2M     | N <sub>1</sub> H <sub>1A</sub> ···O <sub>1</sub>  | 1.46E <sup>-02</sup> | 4.95E <sup>-02</sup>  | 1.20E <sup>-02</sup> | -1.16E <sup>-02</sup> | 4.02E <sup>-04</sup>  | -1.06E <sup>+01</sup>         |
|               | N <sub>1</sub> H <sub>1</sub> ···O <sub>5</sub>   | 4.39E <sup>-02</sup> | 1.08E <sup>-01</sup>  | 2.87E <sup>-02</sup> | -3.05E <sup>-02</sup> | -1.78E <sup>-03</sup> | -3.79E <sup>+01</sup>         |
|               | N <sub>2</sub> H <sub>2B</sub> ···O <sub>4</sub>  | 4.80E <sup>-02</sup> | 1.33E <sup>-01</sup>  | 3.47E <sup>-02</sup> | -3.61E <sup>-02</sup> | -1.39E <sup>-03</sup> | -4.17E <sup>+01</sup>         |
|               | O <sub>6</sub> H <sub>6A</sub> ···O <sub>4</sub>  | 4.99E <sup>-02</sup> | 1.60E <sup>-01</sup>  | 4.04E <sup>-02</sup> | -4.09E <sup>-02</sup> | -4.60E <sup>-04</sup> | -4.35E <sup>+01</sup>         |
|               | O <sub>9</sub> H <sub>9</sub> ···O <sub>5</sub>   | 4.00E <sup>-02</sup> | 1.29E <sup>-01</sup>  | 3.18E <sup>-02</sup> | -3.12E <sup>-02</sup> | 5.22E <sup>-04</sup>  | -3.43E <sup>+01</sup>         |
|               | O <sub>8</sub> H <sub>8A</sub> ···O <sub>9</sub>  | 3.81E <sup>-02</sup> | 1.15E <sup>-01</sup>  | 2.88E <sup>-02</sup> | -2.89E <sup>-02</sup> | -3.48E <sup>-05</sup> | -3.25E <sup>+01</sup>         |
|               | O <sub>10</sub> H <sub>10</sub> ···O <sub>8</sub> | 3.28E <sup>-02</sup> | 1.00E <sup>-01</sup>  | 2.49E <sup>-02</sup> | -2.47E <sup>-02</sup> | 1.75E <sup>-04</sup>  | -2.75E <sup>+01</sup>         |
|               | O <sub>7</sub> H <sub>7</sub> ···O <sub>10</sub>  | 4.00E <sup>-02</sup> | 1.22E <sup>-01</sup>  | 3.07E <sup>-02</sup> | -3.09E <sup>-02</sup> | -2.56E <sup>-04</sup> | -3.43E <sup>+01</sup>         |
| TMP-2,6HBA    | N <sub>4</sub> H <sub>4B</sub> ···O <sub>1</sub>  | 1.93E <sup>-02</sup> | 5.46E <sup>-02</sup>  | 1.43E <sup>-02</sup> | -1.50E <sup>-02</sup> | -6.75E <sup>-04</sup> | -1.49E <sup>+01</sup>         |
|               | N <sub>1</sub> H <sub>1</sub> ···O <sub>7</sub>   | 5.09E <sup>-02</sup> | 1.32E <sup>-01</sup>  | 3.55E <sup>-02</sup> | -3.80E <sup>-02</sup> | -2.48E <sup>-03</sup> | -4.44E <sup>+01</sup>         |
|               | N <sub>2</sub> H <sub>2B</sub> ···O <sub>6</sub>  | 4.02E <sup>-02</sup> | 1.18E <sup>-01</sup>  | 2.97E <sup>-02</sup> | -3.00E <sup>-02</sup> | -3.32E <sup>-04</sup> | -3.44E <sup>+01</sup>         |
|               | N <sub>2</sub> H <sub>2A</sub> ···O <sub>4</sub>  | 2.52E <sup>-02</sup> | 7.60E <sup>-02</sup>  | 1.93E <sup>-02</sup> | -1.95E <sup>-02</sup> | -2.74E <sup>-04</sup> | -2.04E <sup>+01</sup>         |
|               | N <sub>4</sub> H <sub>4A</sub> ···O <sub>1</sub>  | 1.98E <sup>-02</sup> | 5.43E <sup>-02</sup>  | 1.44E <sup>-02</sup> | -1.52E <sup>-02</sup> | -8.13E <sup>-04</sup> | -1.54E <sup>+01</sup>         |
|               | O <sub>4</sub> H <sub>4</sub> ···O <sub>6</sub>   | 7.43E <sup>-02</sup> | 1.71E <sup>-01</sup>  | 5.68E <sup>-02</sup> | -7.08E <sup>-02</sup> | -1.40E <sup>-02</sup> | -6.62E <sup>+01</sup>         |
|               | O <sub>5</sub> H <sub>5</sub> ···O <sub>7</sub>   | 5.30E <sup>-02</sup> | 1.50E <sup>-01</sup>  | 4.06E <sup>-02</sup> | -4.37E <sup>-02</sup> | -3.10E <sup>-03</sup> | -4.64E <sup>+01</sup>         |

**Table S6. FTIR stretching vibration frequencies of TMP, CCF and salts.**

| Compound | C=O (cm <sup>-1</sup> ) | N-H (cm <sup>-1</sup> ) |
|----------|-------------------------|-------------------------|
| TMP      | N/A                     | 3471.0; 3319.5          |
| SYA      | 1694.5                  | N/A                     |
| OA       | 1694.5                  | N/A                     |
| 2,5HBA   | 1663.6                  | N/A                     |

|               |        |                |
|---------------|--------|----------------|
| GA            | 1665.6 | N/A            |
| 2,6HBA        | 1675.9 | N/A            |
| TMP-SYA-0.16H | 1657.4 | 3502.3; 3343.6 |
| TMP-OA        | 1694.5 | 3459.0; 3341.6 |
| TMP-2,5HBA    | 1659.4 | 3465.2; 3337.4 |
| TMP-GA-2M     | 1663.6 | 3432.2; 3331.2 |
| TMP-2,6HBA    | 1661.5 | 3471.4; 3327.1 |

**Table S7. pKa and  $\Delta$ pKa values of TMP and the cofomers.**

| $pK_a(pK_{a1})$ | Cofomer | $pK_a(pK_{a2})$ | $\Delta pK_a(pK_{a1}-pK_{a2})$ | forms |
|-----------------|---------|-----------------|--------------------------------|-------|
| TMP (7.04)      | SYA     | 4.33            | 2.71                           | salt  |
|                 | OA      | 2.78            | 4.26                           | salt  |
|                 | 2,5HBA  | 3.01            | 4.03                           | salt  |
|                 | GA      | 4.21            | 2.83                           | salt  |
|                 | 2,6HBA  | 1.30            | 5.74                           | salt  |

**Table S8. Test results of water content in sample TMP-SYA-0.16H.**

| Sample          | Water content (Mass ratio) | Corresponding molecular formula |
|-----------------|----------------------------|---------------------------------|
| 1 <sup>st</sup> | 0.5762%                    | <b>TMP-SYA-0.157H</b>           |
| 2 <sup>nd</sup> | 0.6120%                    | <b>TMP-SYA-0.170H</b>           |
| 3 <sup>rd</sup> | 0.5831%                    | <b>TMP-SYA-0.159H</b>           |
| 4 <sup>th</sup> | 0.6019%                    | <b>TMP-SYA-0.164H</b>           |
| 5 <sup>th</sup> | 0.5976%                    | <b>TMP-SYA-0.162H</b>           |
| 6 <sup>th</sup> | 0.6002%                    | <b>TMP-SYA-0.164H</b>           |
| Average         | 0.5952%                    | <b>TMP-SYA-0.162H</b>           |
